# Supplementary material
Source: Springer Nature journal article supplement (https://www.springermedizin.de/resource/supplementary/12955_2013_1186_MOESM1_ESM.pdf/9558998)
Supplement: MOESM1 [file 9558998]

**Spanish version of Revised Fibromyalgia Impact Questionnaire (FIQR)**

**1.- Instrucciones:** Para cada pregunta marque una **X** en la casilla que mejor indique la dificultad con la que ha realizado cada una de las siguientes actividades a causa de la fibromialgia durante la última semana

**DIFICULTAD**

|                                                        |         |                                                                                                                                                                                                                                                                                                                                                               |        |
|--------------------------------------------------------|---------|---------------------------------------------------------------------------------------------------------------------------------------------------------------------------------------------------------------------------------------------------------------------------------------------------------------------------------------------------------------|--------|
| a) Peinarse                                            | Ninguna | <input type="checkbox"/> | Máxima |
| b) Caminar 20 minutos sin necesidad de pararse         | Ninguna | <input type="checkbox"/> | Máxima |
| c) Preparar la comida                                  | Ninguna | <input type="checkbox"/> | Máxima |
| d) Barrer, fregar o pasar la aspiradora                | Ninguna | <input type="checkbox"/> | Máxima |
| e) Levantar y transportar una bolsa de la compra llena | Ninguna | <input type="checkbox"/> | Máxima |
| f) Subir escaleras                                     | Ninguna | <input type="checkbox"/> | Máxima |
| g) Cambiar la ropa de la cama                          | Ninguna | <input type="checkbox"/> | Máxima |
| h) Estar sentada en una silla durante 45 minutos       | Ninguna | <input type="checkbox"/> | Máxima |
| i) Hacer la compra                                     | Ninguna | <input type="checkbox"/> | Máxima |

**2.- Instrucciones:** Para cada pregunta marque una **X** en la casilla que mejor indique la influencia global que ha ejercido su fibromialgia en los últimos 7 días

|                                                                         |       |                                                                                                                                                                                                                                                                                                                                                               |         |
|-------------------------------------------------------------------------|-------|---------------------------------------------------------------------------------------------------------------------------------------------------------------------------------------------------------------------------------------------------------------------------------------------------------------------------------------------------------------|---------|
| a) La fibromialgia me impidió hacer lo que tenía proyectado esta semana | Nunca | <input type="checkbox"/> | Siempre |
| b) Los síntomas de mi fibromialgia me tuvieron totalmente abrumada      | Nunca | <input type="checkbox"/> | Siempre |

**3.- Instrucciones:** Para cada pregunta marque una **X** en la casilla que mejor **indique la intensidad de los síntomas de su fibromialgia durante los últimos 7 días**

|                                                                                  |                              |                                                                                                                                                                                                                                                                                                                                                                                                                 |                               |
|----------------------------------------------------------------------------------|------------------------------|-----------------------------------------------------------------------------------------------------------------------------------------------------------------------------------------------------------------------------------------------------------------------------------------------------------------------------------------------------------------------------------------------------------------|-------------------------------|
| a) Dolor                                                                         | <b>Ningún dolor</b>          | <input type="checkbox"/> | <b>Dolor insoportable</b>     |
| b) Energía                                                                       | <b>Muchísima energía</b>     | <input type="checkbox"/> | <b>Ninguna energía</b>        |
| c) Rigidez                                                                       | <b>Ninguna rigidez</b>       | <input type="checkbox"/> | <b>Rigidez intensa</b>        |
| d) Calidad del sueño                                                             | <b>Me levanto descansada</b> | <input type="checkbox"/> | <b>Me levanto muy cansada</b> |
| e) Depresión                                                                     | <b>Nada deprimida</b>        | <input type="checkbox"/> | <b>Muy deprimida</b>          |
| f) Problemas de memoria                                                          | <b>Buena memoria</b>         | <input type="checkbox"/> | <b>Muy mala memoria</b>       |
| g) Ansiedad                                                                      | <b>Nada ansiosa</b>          | <input type="checkbox"/> | <b>Muy ansiosa</b>            |
| h) Dolorimiento al tacto                                                         | <b>Ninguno</b>               | <input type="checkbox"/> | <b>Muchísimo</b>              |
| i) Problemas de equilibrio                                                       | <b>Ninguno</b>               | <input type="checkbox"/> | <b>Severos</b>                |
| j) Grado de sensibilidad al ruido intenso, la luz brillante, los olores, el frío | <b>Ninguna sensibilidad</b>  | <input type="checkbox"/> | <b>Mucha sensibilidad</b>     |
